# Supplementary material for: Assessing the impact of Laurentide Ice Sheet topography on glacial climate
Source: Copernicus journal article supplement (doi:10.5194/cp-10-487-2014), 2014-03-13
Supplement: Supplementary file 1 [file cp-10-487-2014-supplement.zip]

Archive with 13 entries (12 files):
- ullman_etal_2013_CP_supp.pdf
- __MACOSX/
- __MACOSX/._ullman_etal_2013_CP_supp.pdf
- ullman_etal_figS1_NEW.jpg
- __MACOSX/._ullman_etal_figS1_NEW.jpg
- ullman_etal_figS2_NEW.jpg
- __MACOSX/._ullman_etal_figS2_NEW.jpg
- ullman_etal_figS3_NEW.jpg
- __MACOSX/._ullman_etal_figS3_NEW.jpg
- ullman_etal_figS4.jpg
- __MACOSX/._ullman_etal_figS4.jpg
- ullman_etal_figS5_NEW.jpg
- __MACOSX/._ullman_etal_figS5_NEW.jpg
