# Supplementary figures and images for: Assessing the impact of Laurentide Ice Sheet topography on glacial climate
Source: Copernicus journal article supplement (doi:10.5194/cp-10-487-2014), 2014-03-13

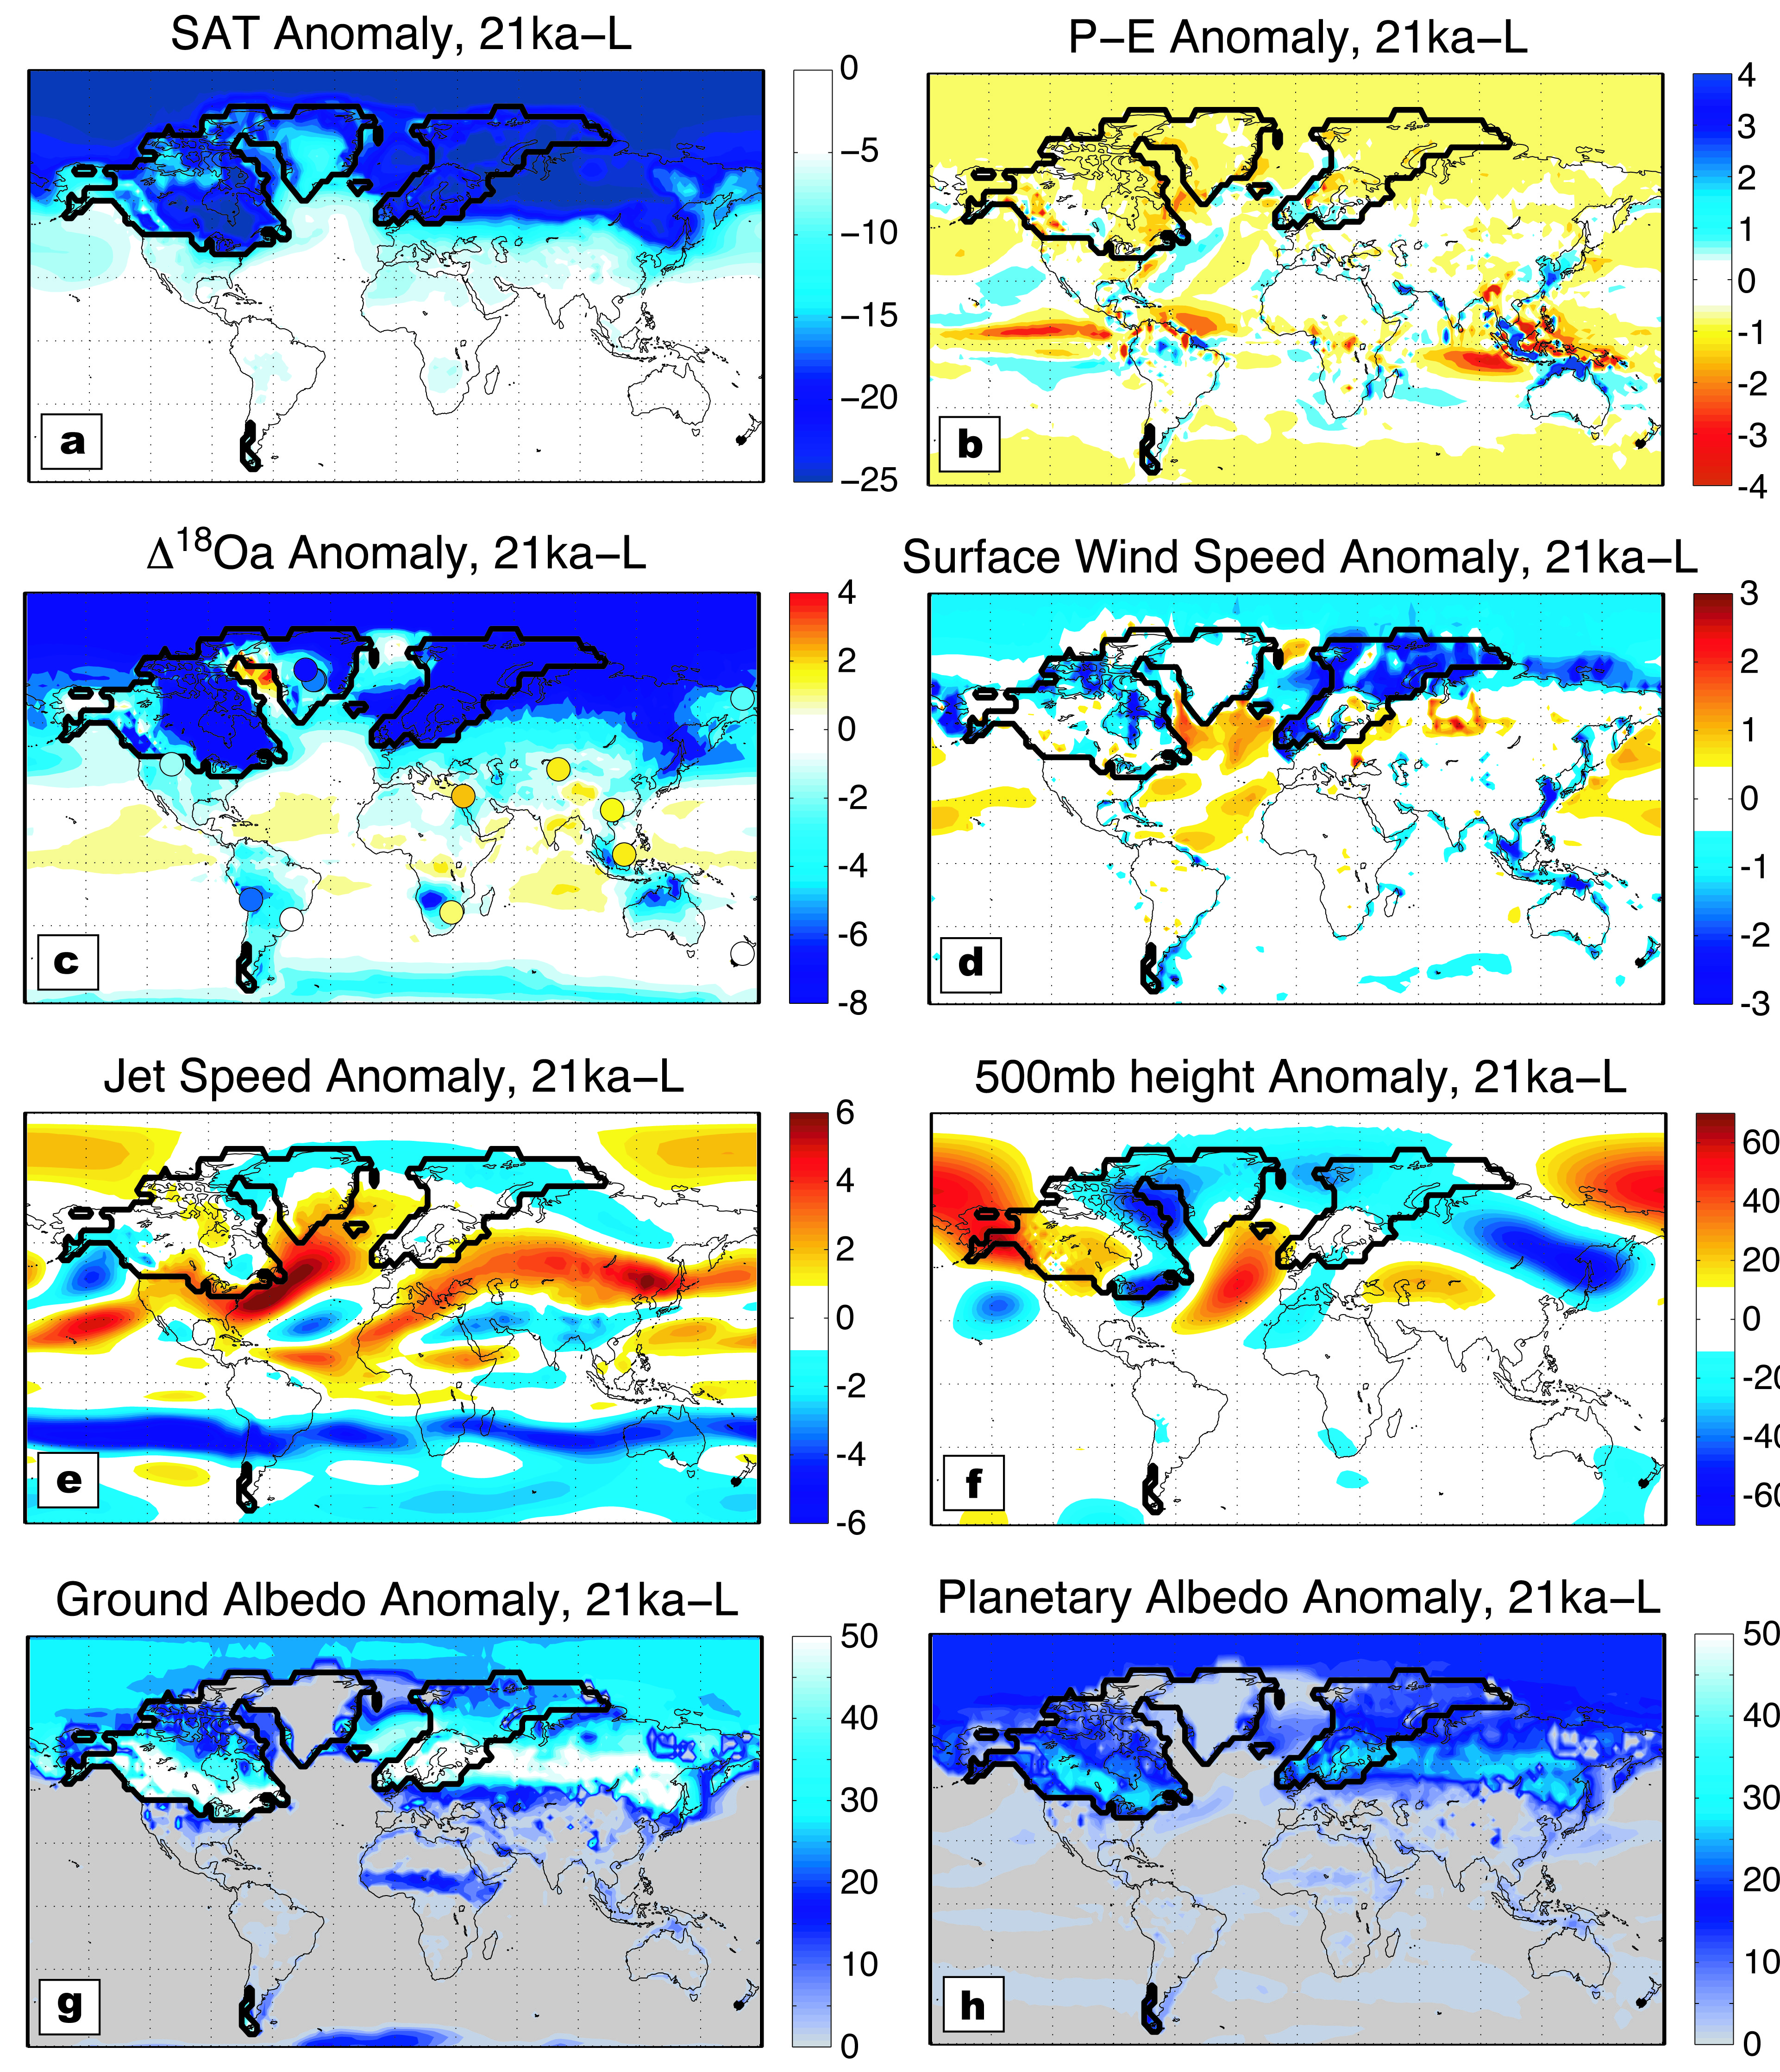

Supplement: Supplementary file 1 [file cp-10-487-2014-supplement.zip › ullman_etal_figS1_NEW.jpg]

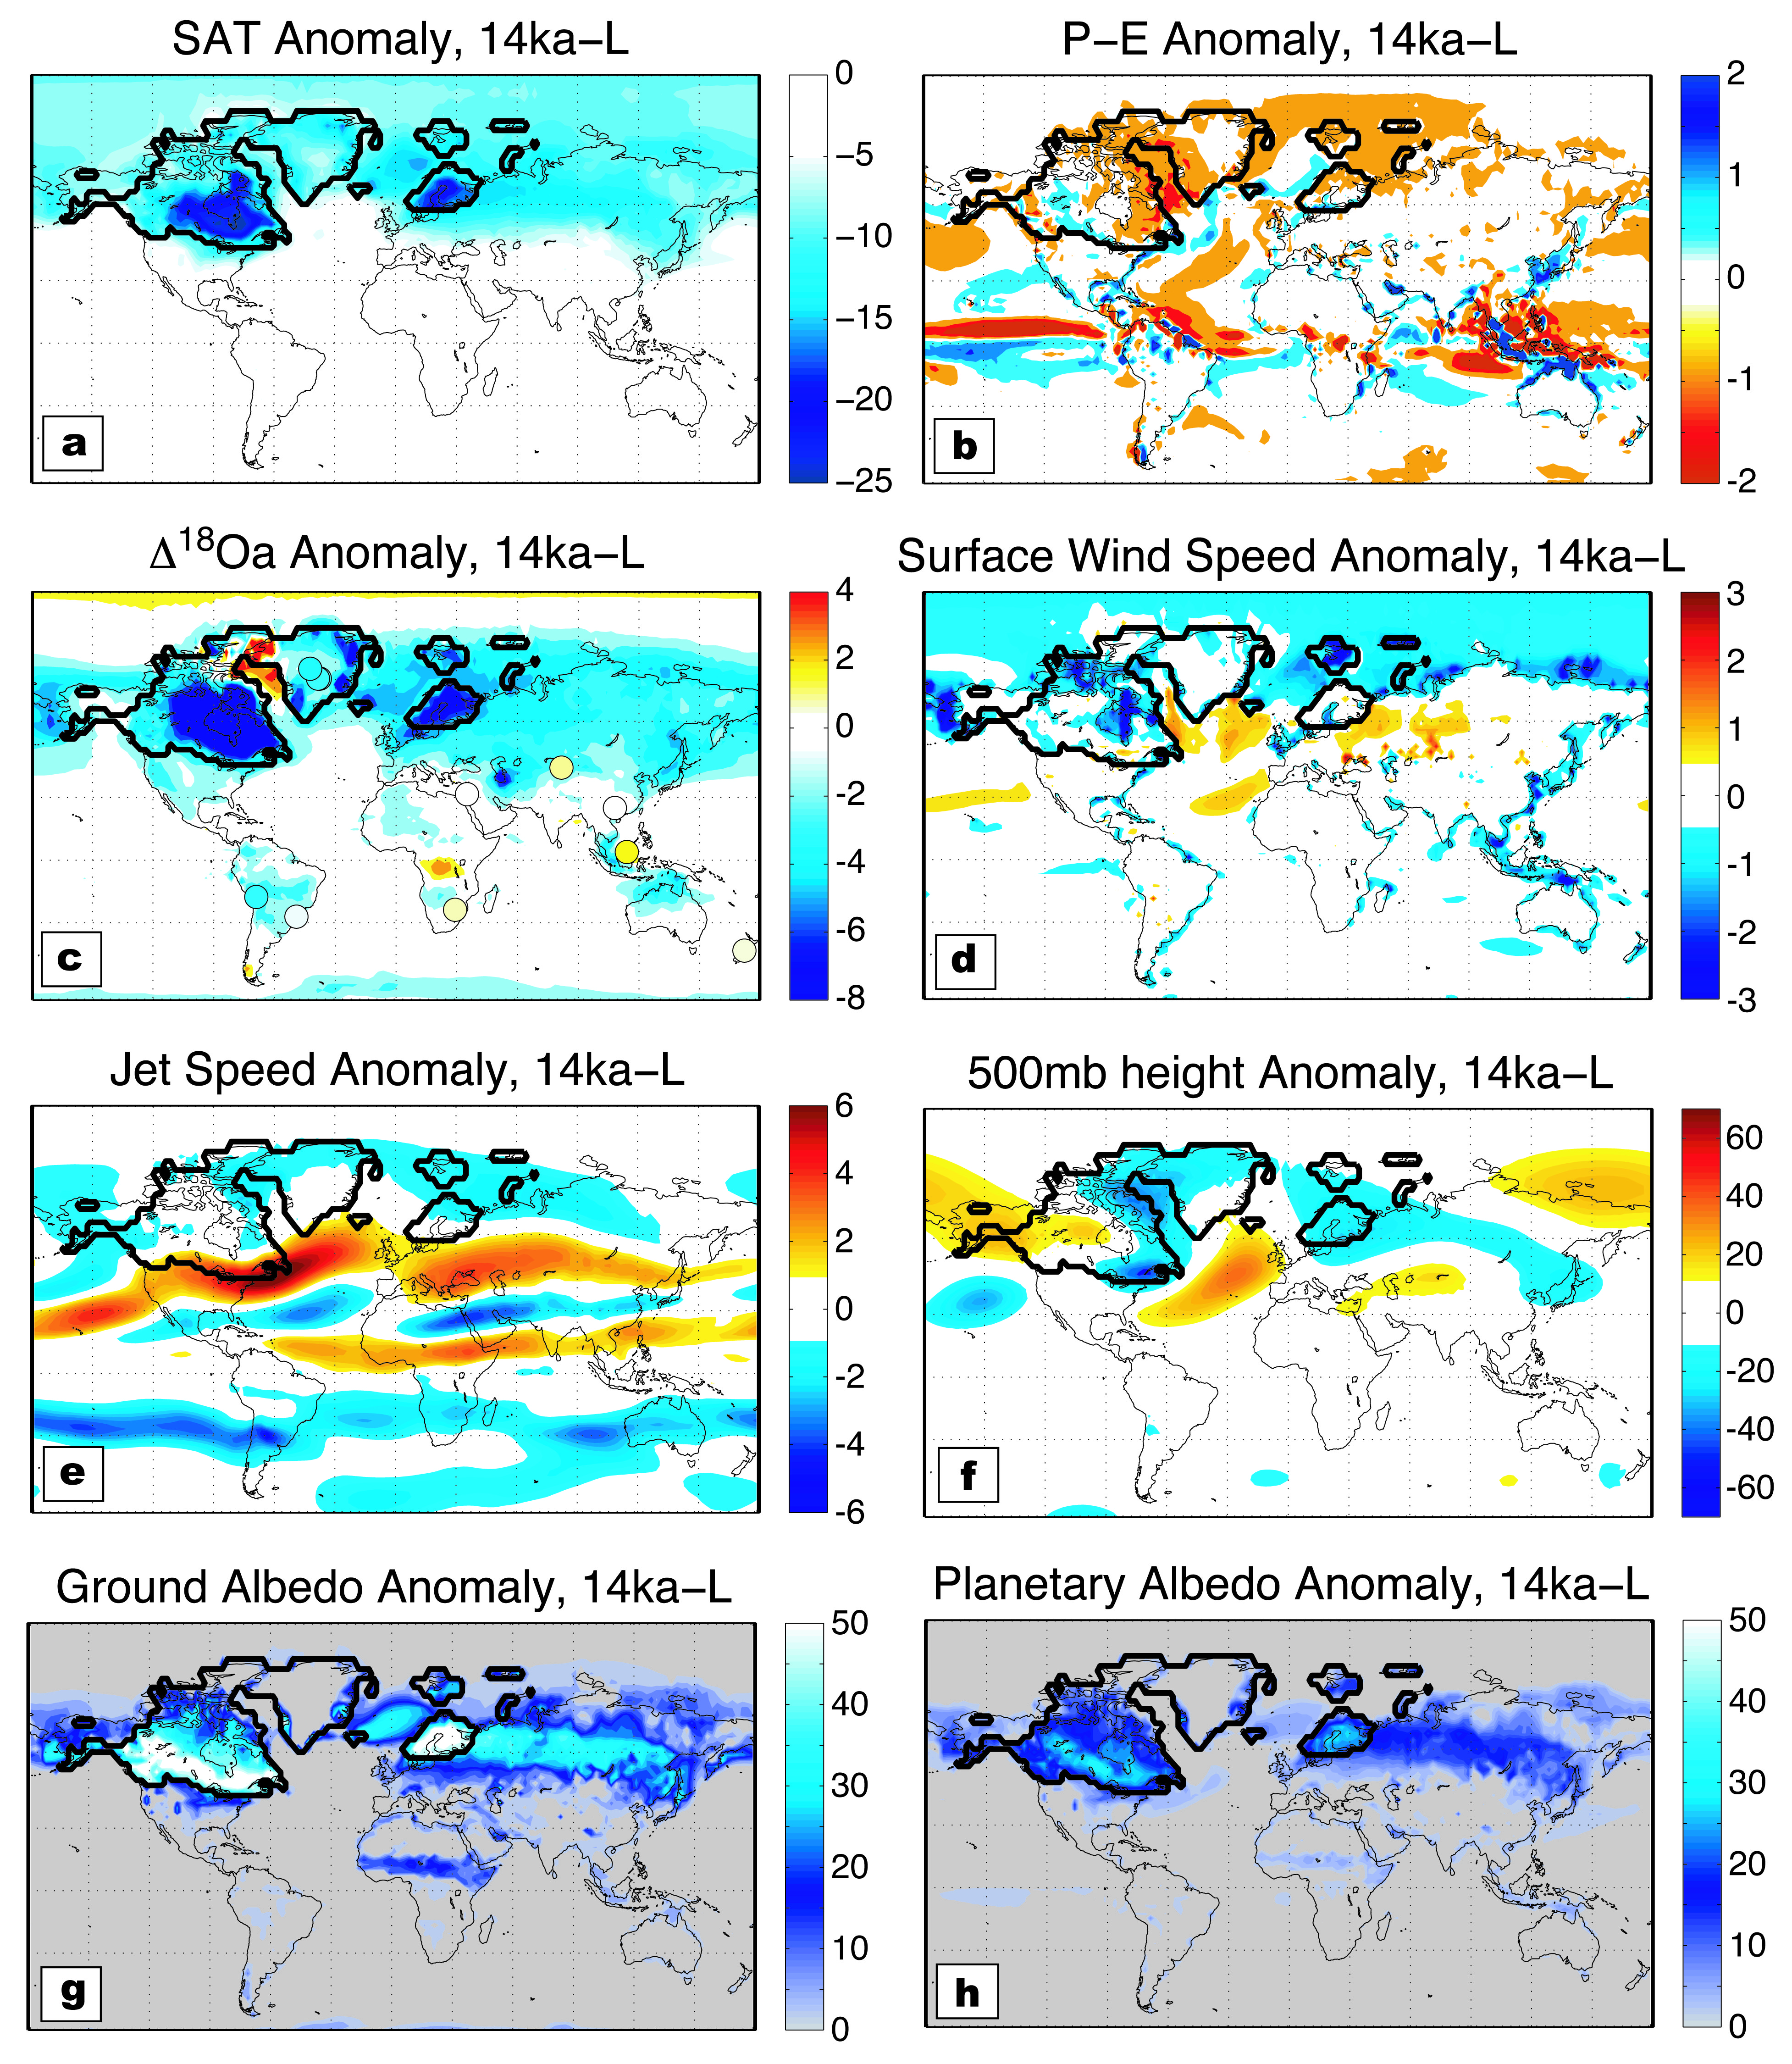

Supplement: Supplementary file 1 [file cp-10-487-2014-supplement.zip › ullman_etal_figS2_NEW.jpg]

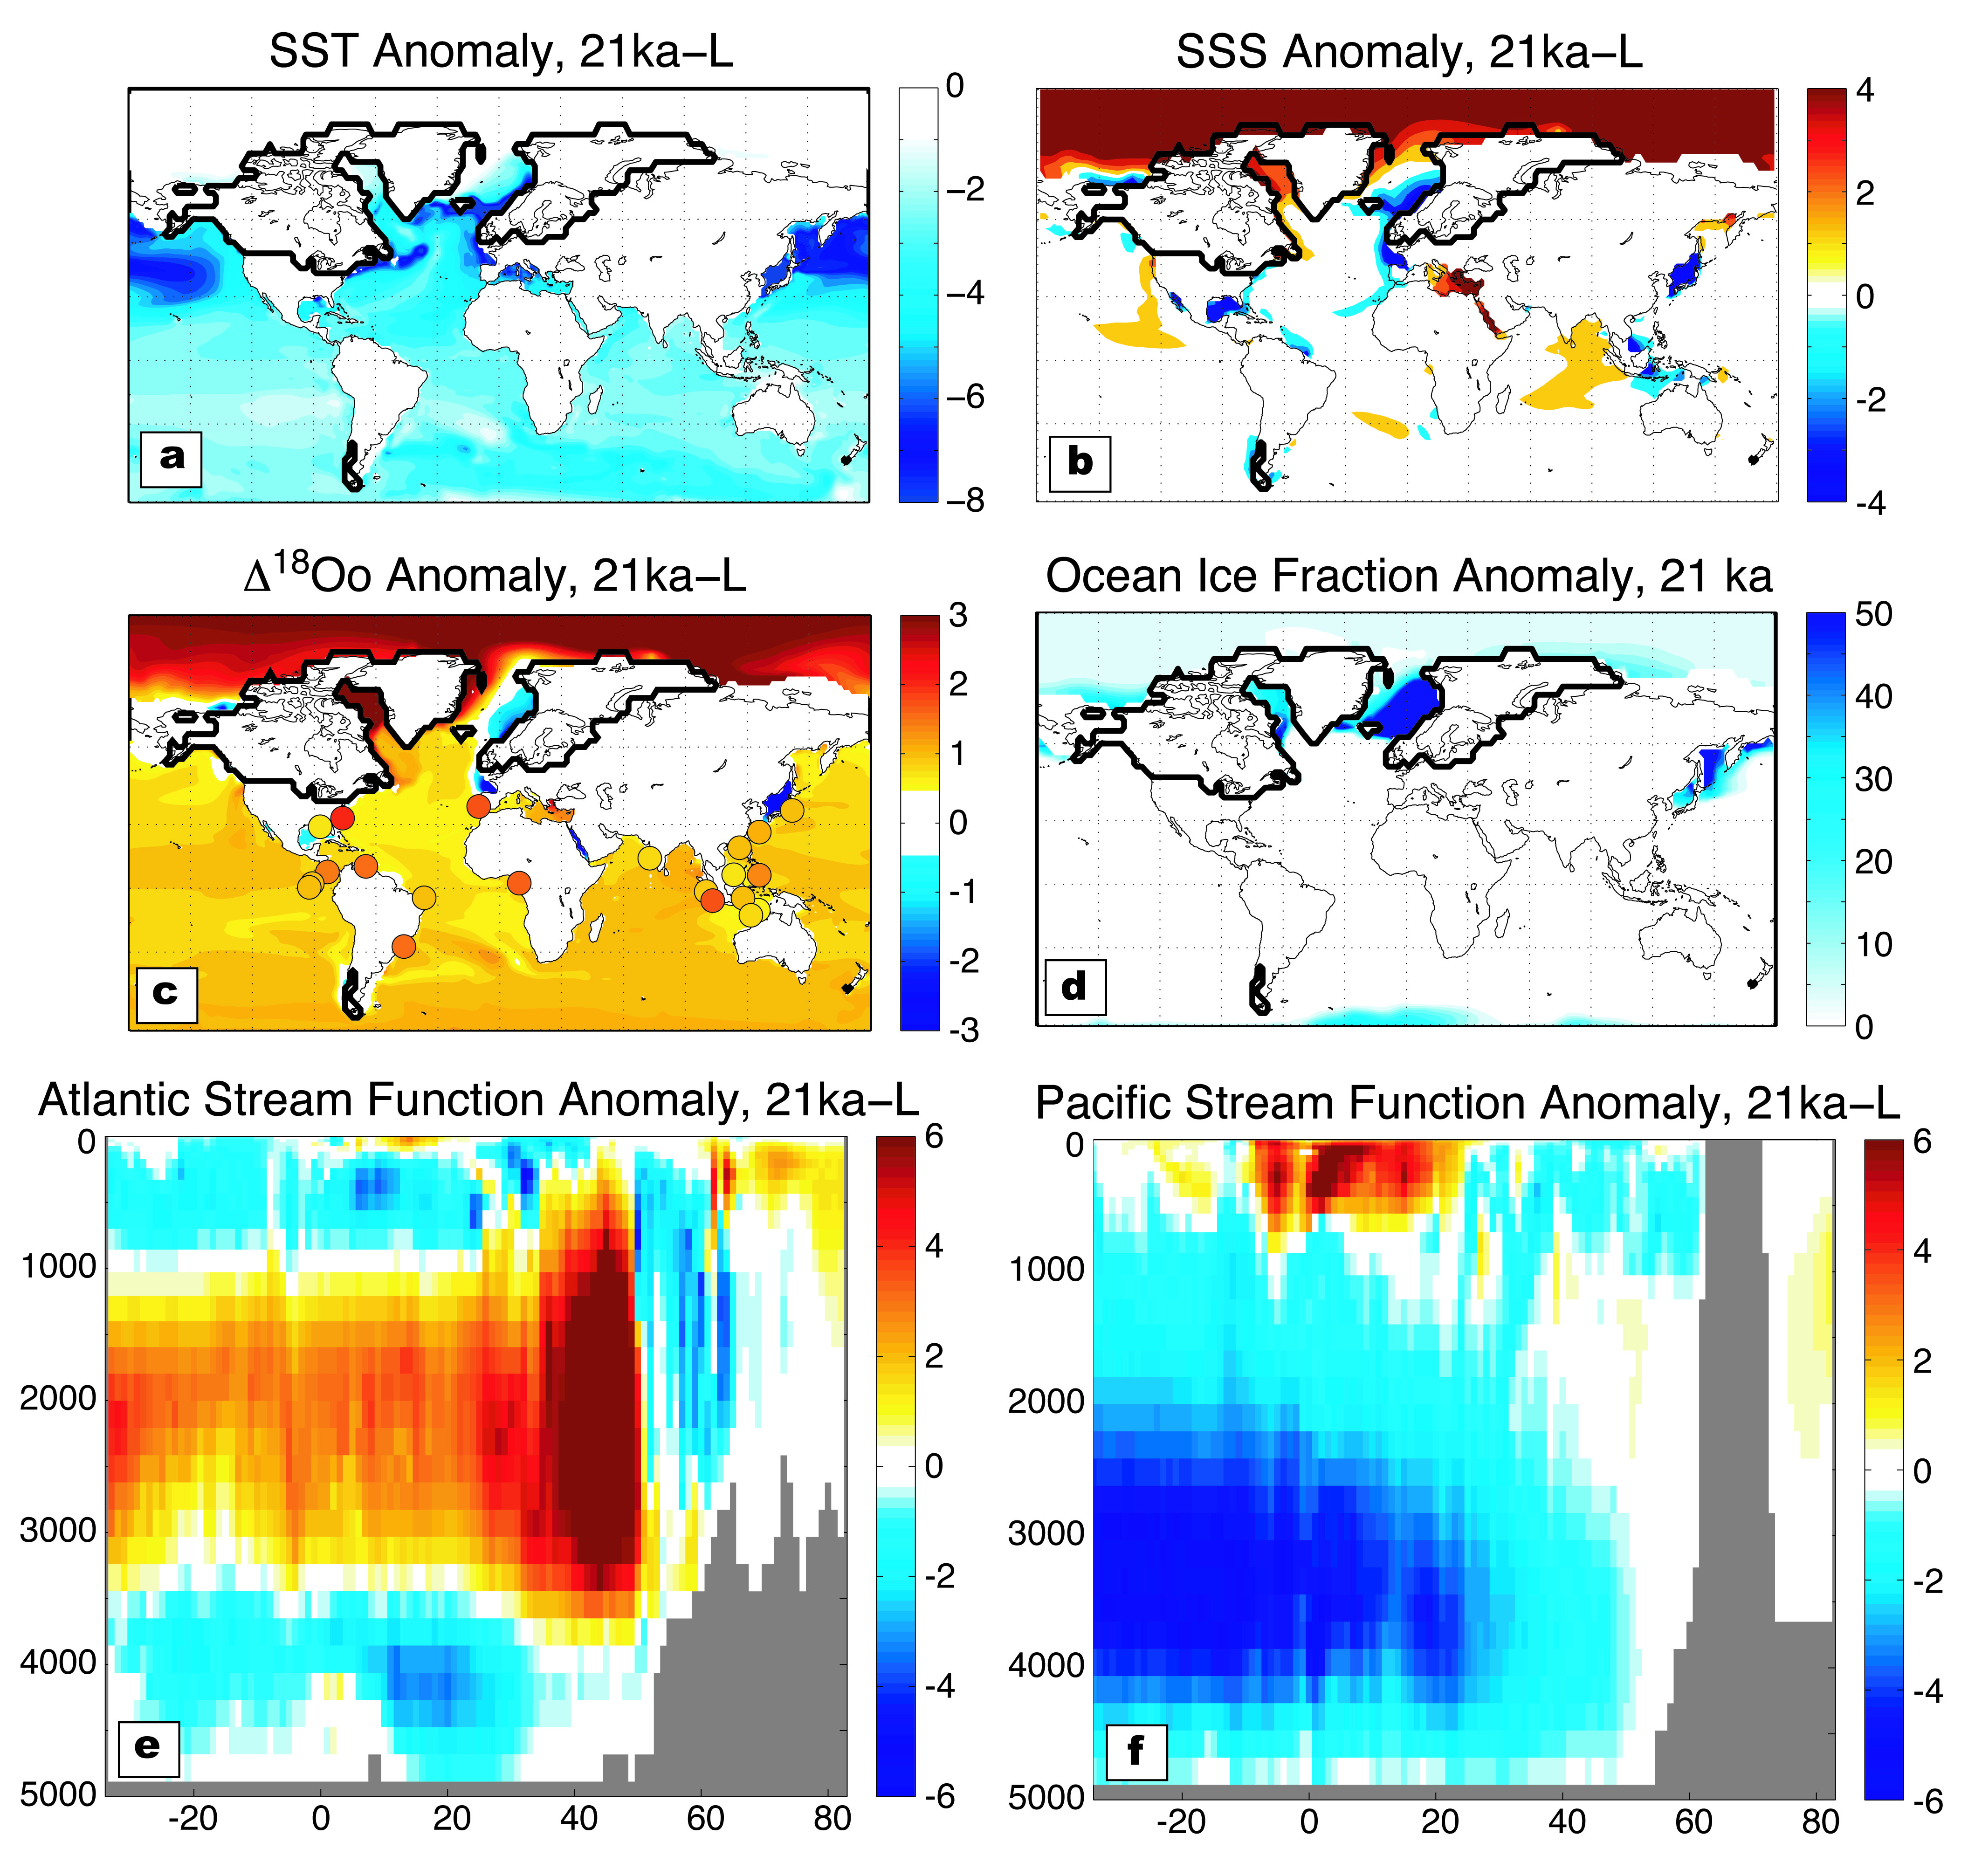

Supplement: Supplementary file 1 [file cp-10-487-2014-supplement.zip › ullman_etal_figS3_NEW.jpg]

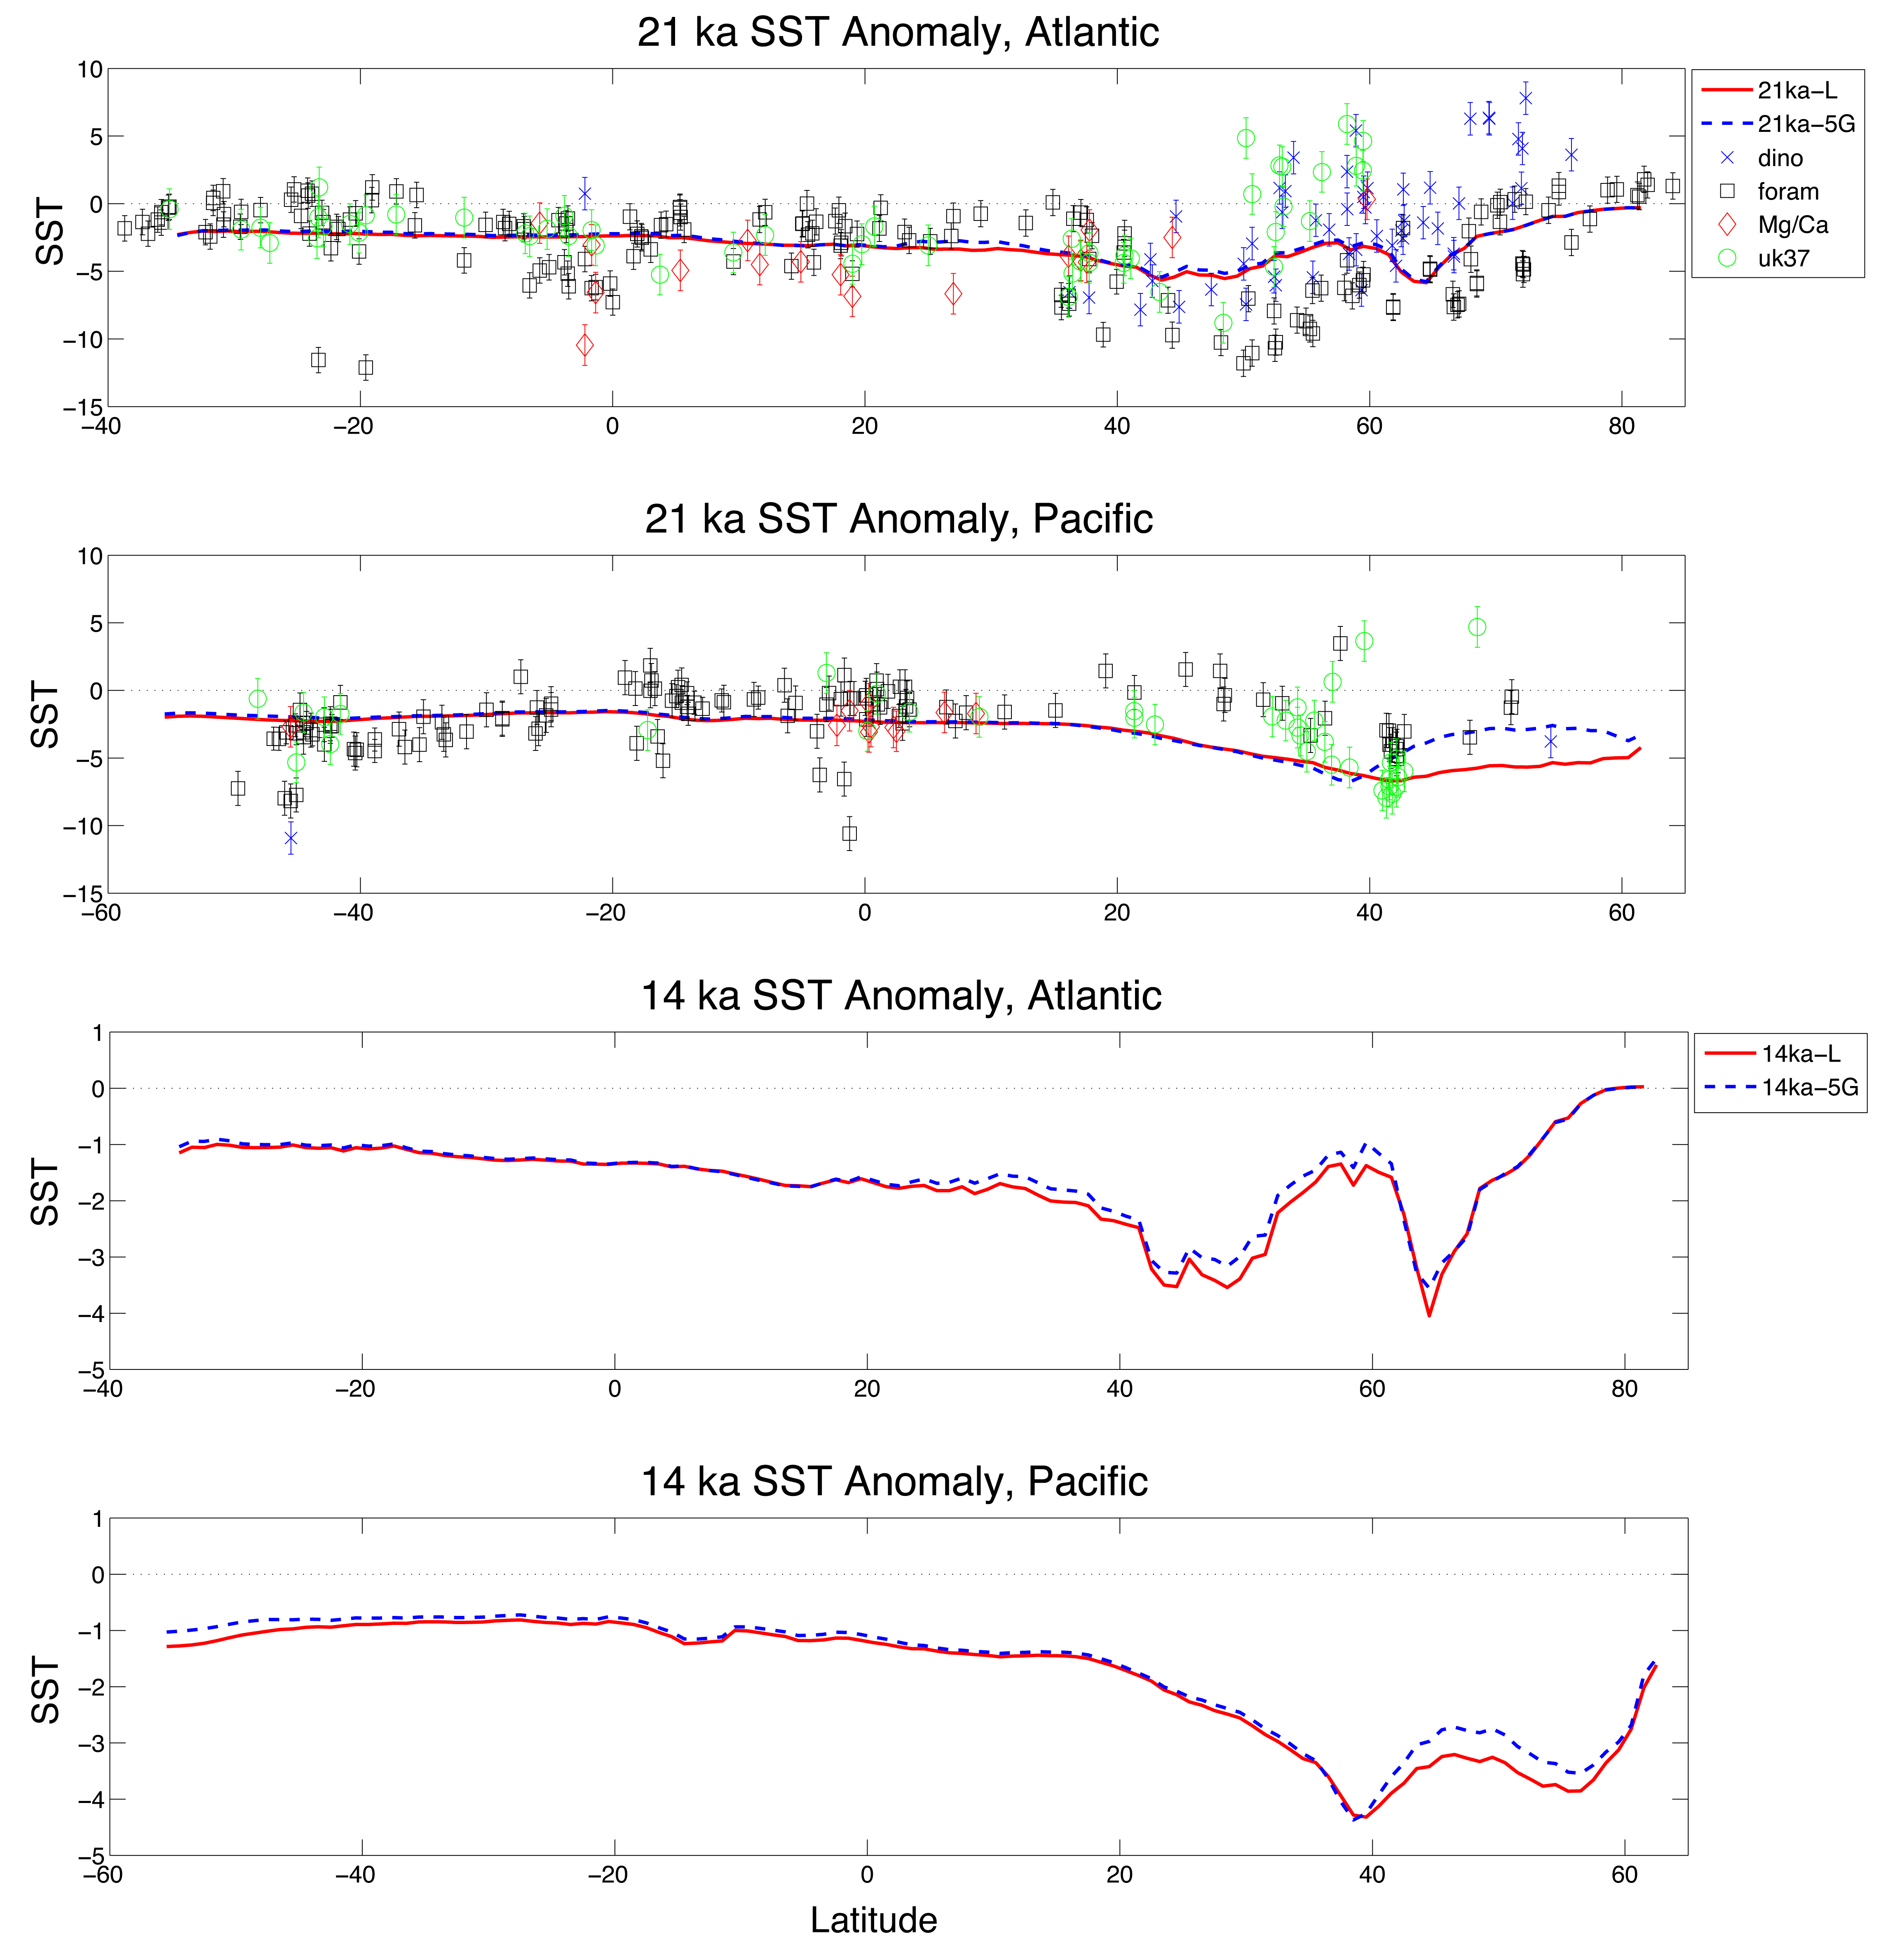

Supplement: Supplementary file 1 [file cp-10-487-2014-supplement.zip › ullman_etal_figS4.jpg]

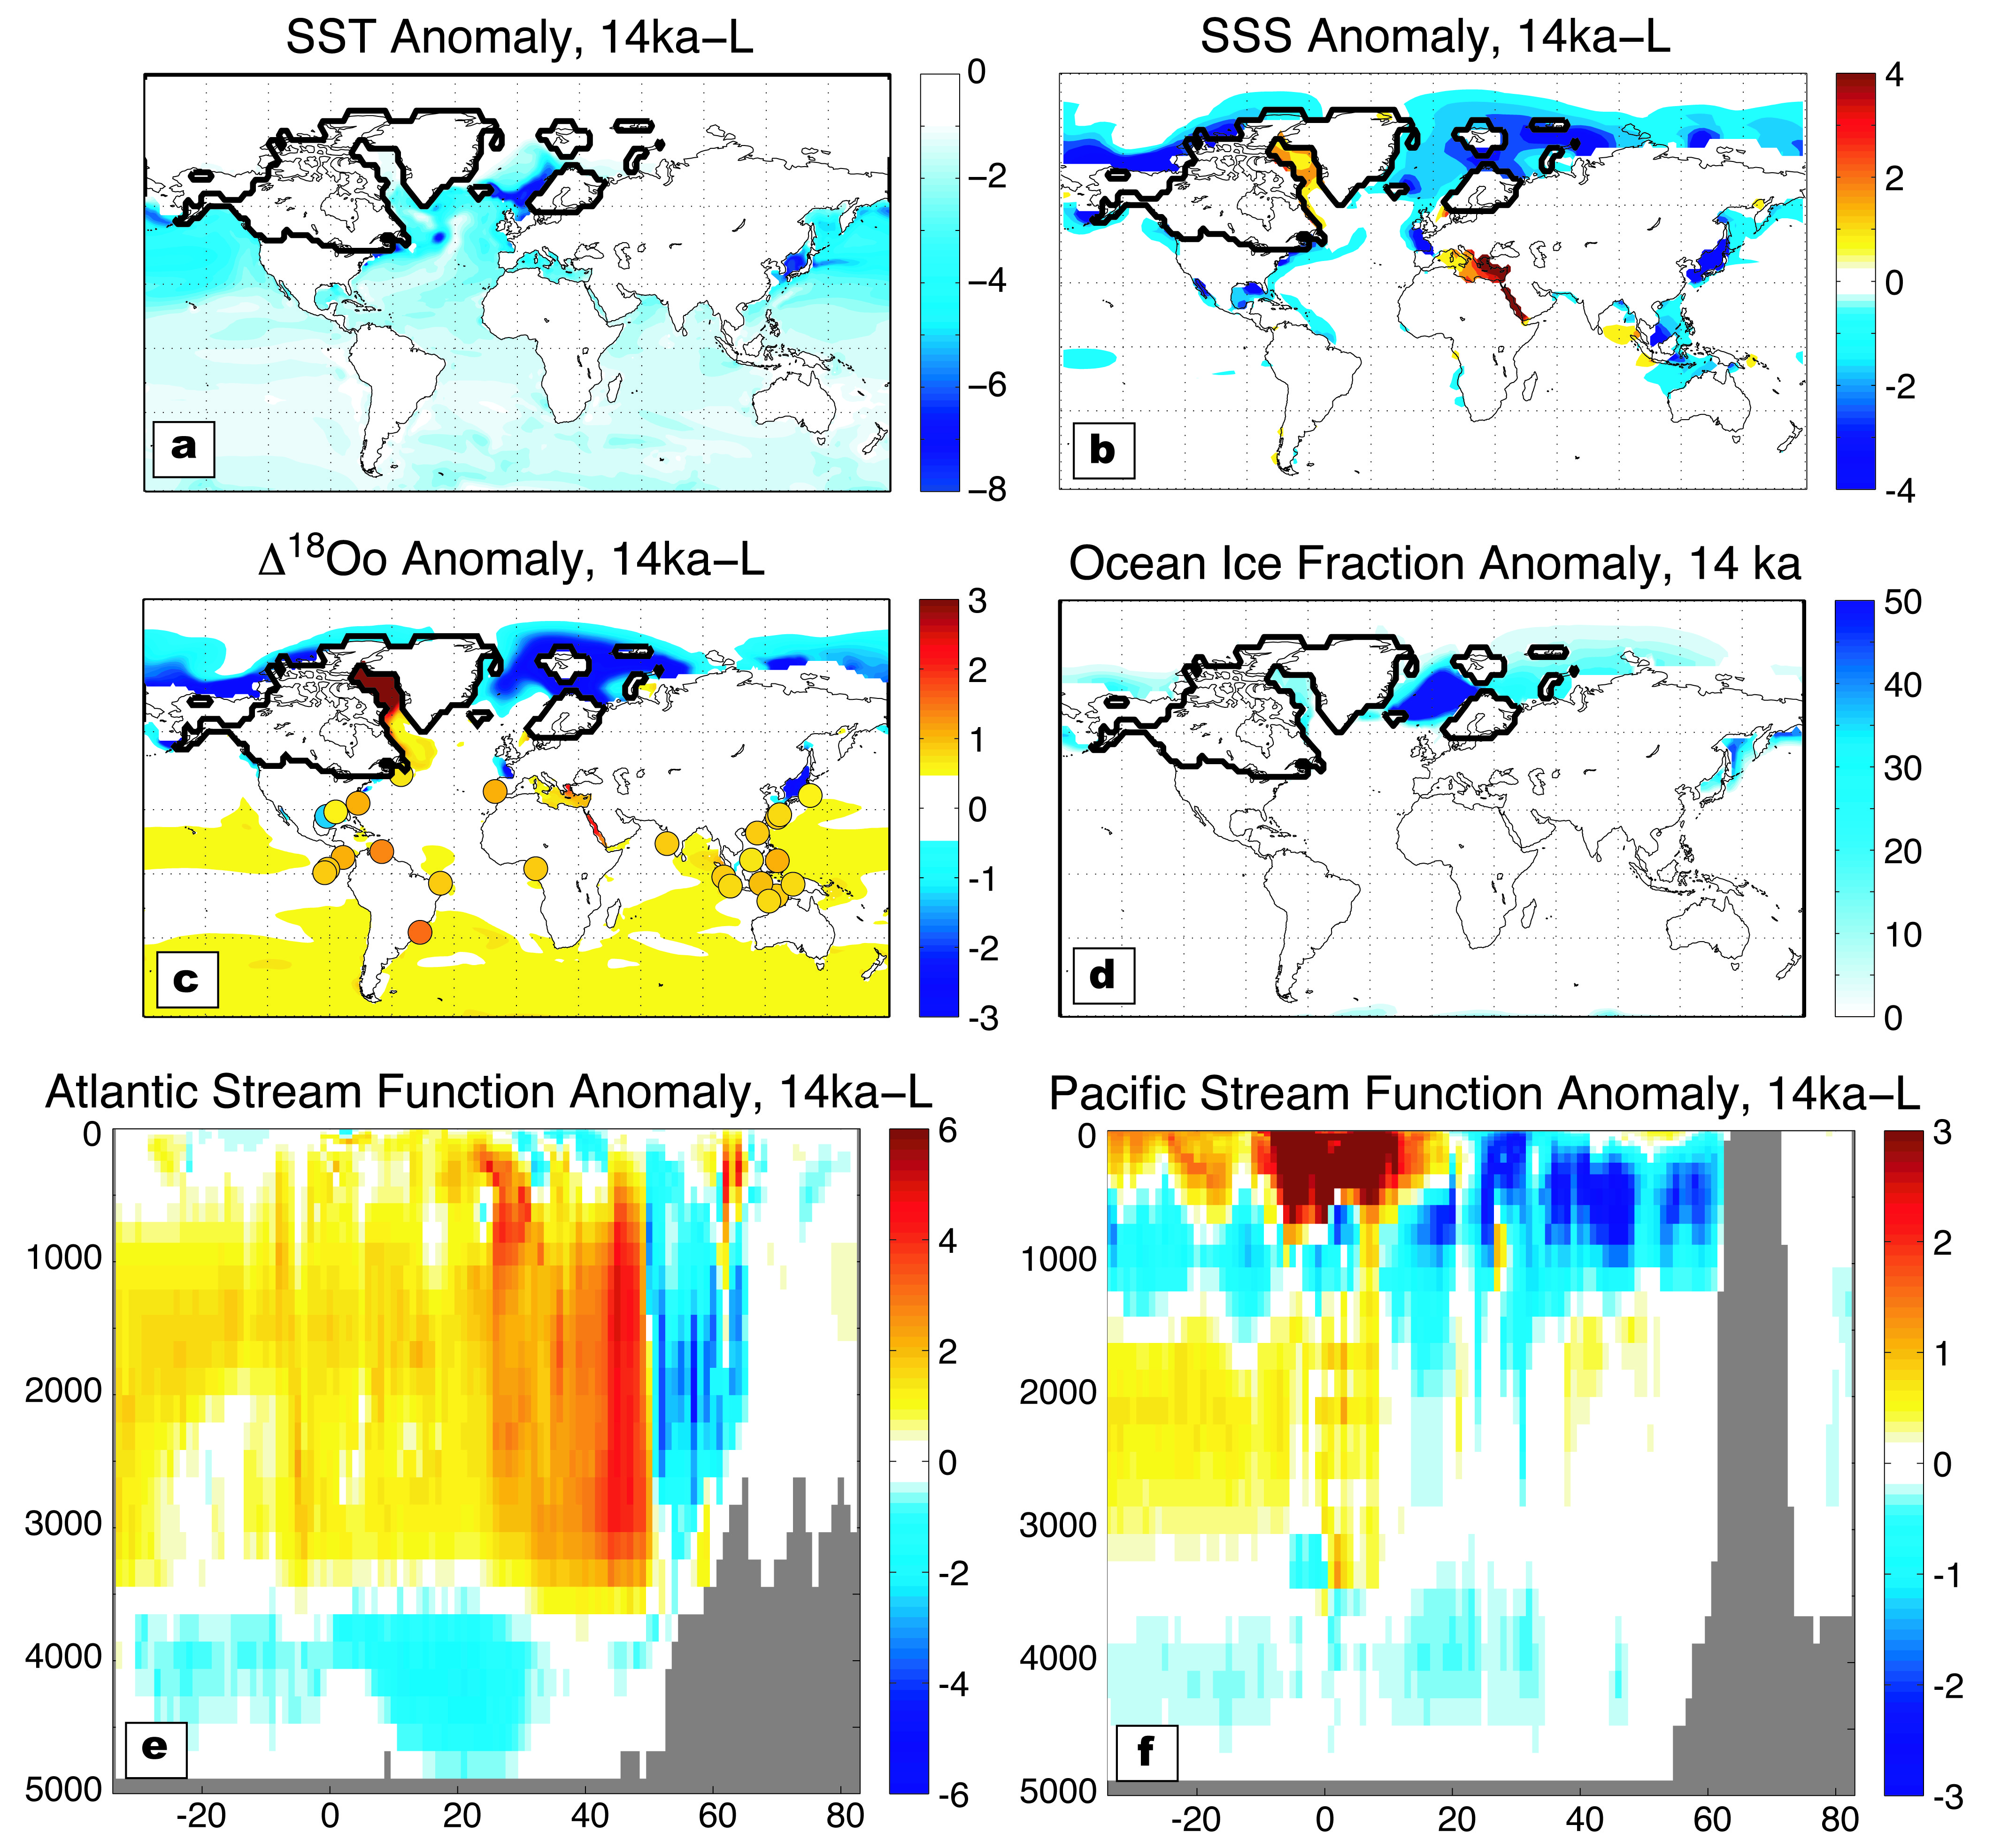

Supplement: Supplementary file 1 [file cp-10-487-2014-supplement.zip › ullman_etal_figS5_NEW.jpg]
